# Supplementary material for: TypeLoader2: Automated submission of novel HLA and killer‐cell immunoglobulin‐like receptor alleles in full length
Source: PubMed Central journal article supplement (PMC6594033; doi:10.1111/tan.13508), 2019-03-25
Supplement: TAN-93-195-s002.pdf [file TAN-93-195-s002.pdf]

**Projects and Samples:**

- ▼ Open
  - ▶ 20181114\_KP\_KIR2DS1\_2DS1A
  - ▶ 20181114\_KP\_KIR2DL5\_2DL5A
  - ▶ 20181113\_KP\_KIR2DL1\_2DL1B
  - ▶ 20181024\_KP\_KIR3DL3\_3DL3AB
- ▶ Closed

**Allele Overview:**

Filter:  Internal Sample ID Filter! Remove Filter

|    | Internal Sample ID | Allele Nr. in Sample | Project Name              | Nr. in Project | Cell Line           | Local Name        | Gene    | Goal    | Allele Status | Original Allele #1 | On |
|----|--------------------|----------------------|---------------------------|----------------|---------------------|-------------------|---------|---------|---------------|--------------------|----|
| 1  | ID14362529         | 1                    | 20181114_KP_KIR2DS1_2DS1A | 1              | DKMS-LSL-KIR2DS1-1  | ID14362529_2DS1_1 | KIR2DS1 | novel   | IPD submitted |                    |    |
| 2  | ID18278598         | 1                    | 20181114_KP_KIR2DS1_2DS1A | 2              | DKMS-LSL-KIR2DS1-2  | ID18278598_2DS1_1 | KIR2DS1 | novel   | IPD submitted |                    |    |
| 3  | ID10389037         | 1                    | 20181114_KP_KIR2DS1_2DS1A | 3              | DKMS-LSL-KIR2DS1-3  | ID10389037_2DS1_1 | KIR2DS1 | novel   | IPD submitted |                    |    |
| 4  | ID15918912         | 1                    | 20181114_KP_KIR2DS1_2DS1A | 4              | DKMS-LSL-KIR2DS1-4  | ID15918912_2DS1_1 | KIR2DS1 | extend  | IPD submitted |                    |    |
| 5  | ID12861362         | 1                    | 20181114_KP_KIR2DS1_2DS1A | 5              | DKMS-LSL-KIR2DS1-5  | ID12861362_2DS1_1 | KIR2DS1 | extend  | IPD submitted |                    |    |
| 6  | ID14582611         | 1                    | 20181114_KP_KIR2DS1_2DS1A | 6              | DKMS-LSL-KIR2DS1-6  | ID14582611_2DS1_1 | KIR2DS1 | novel   | IPD submitted |                    |    |
| 7  | ID14362529         | 2                    | 20181114_KP_KIR2DS1_2DS1A | 7              | DKMS-LSL-KIR2DS1-7  | ID14362529_2DS1_2 | KIR2DS1 | novel   | abandoned     |                    |    |
| 8  | ID10510365         | 1                    | 20181114_KP_KIR2DS1_2DS1A | 8              | DKMS-LSL-KIR2DS1-8  | ID10510365_2DS1_1 | KIR2DS1 | novel   | IPD submitted |                    |    |
| 9  | ID18610090         | 1                    | 20181114_KP_KIR2DS1_2DS1A | 9              | DKMS-LSL-KIR2DS1-9  | ID18610090_2DS1_1 | KIR2DS1 | confirm | IPD submitted |                    |    |
| 10 | ID19890222         | 1                    | 20181114_KP_KIR2DS1_2DS1A | 10             | DKMS-LSL-KIR2DS1-10 | ID19890222_2DS1_1 | KIR2DS1 | novel   | ENA-problem   |                    |    |
| 11 | ID16519526         | 1                    | 20181114_KP_KIR2DS1_2DS1A | 11             | DKMS-LSL-KIR2DS1-11 | ID16519526_2DS1_1 | KIR2DS1 | novel   | IPD submitted |                    |    |
| 12 | ID15506023         | 1                    | 20181114_KP_KIR2DS1_2DS1A | 12             | DKMS-LSL-KIR2DS1-12 | ID15506023_2DS1_1 | KIR2DS1 | novel   | IPD submitted |                    |    |
| 13 | ID18720846         | 1                    | 20181114_KP_KIR2DS1_2DS1A | 13             | DKMS-LSL-KIR2DS1-13 | ID18720846_2DS1_1 | KIR2DS1 | novel   | IPD submitted |                    |    |
| 14 | ID16092957         | 1                    | 20181114_KP_KIR2DS1_2DS1A | 14             | DKMS-LSL-KIR2DS1-14 | ID16092957_2DS1_1 | KIR2DS1 | novel   | IPD submitted |                    |    |
| 15 | ID13303503         | 1                    | 20181114_KP_KIR2DS1_2DS1A | 15             | DKMS-LSL-KIR2DS1-15 | ID13303503_2DS1_1 | KIR2DS1 | confirm | ENA-ready     |                    |    |
| 16 | ID15304132         | 1                    | 20181114_KP_KIR2DS1_2DS1A | 16             | DKMS-LSL-KIR2DS1-16 | ID15304132_2DS1_1 | KIR2DS1 | novel   | ENA-ready     |                    |    |
| 17 | ID12165299         | 1                    | 20181114_KP_KIR2DS1_2DS1A | 17             | DKMS-LSL-KIR2DS1-17 | ID12165299_2DS1_1 | KIR2DS1 | novel   | ENA submitted |                    |    |
| 18 | ID13659720         | 1                    | 20181114_KP_KIR2DS1_2DS1A | 18             | DKMS-LSL-KIR2DS1-18 | ID13659720_2DS1_1 | KIR2DS1 | novel   | ENA submitted |                    |    |
